# Supplementary material
Source: HighWire-hosted journal article supplement (https://erj.ersjournals.com/content/57/3/2000018)
Supplement: inline-supplementary-material-3 [file inline-supplementary-material-3.pdf]

Supplementary table S9. Background of study cases in the analysis of BAL

|                                   | Control                  | IPF                      |
|-----------------------------------|--------------------------|--------------------------|
| Number                            | 4                        | 25                       |
| Male sex (%)                      | 2 (50.0)                 | 21 (84.0)                |
| Age, years                        | 54.00 [18.00, 62.00]     | 71.00 [46.00, 83.00]     |
| Pirfenidone use, n                | NA                       | 12 (48.0)                |
| Corticosteroid use, n             | NA                       | 5 (20.0)                 |
| Nintedanib use, n                 | NA                       | 8 (32.0)                 |
| Regnase-1 expression in BAL ILC2s | 694.00 [437.00, 1279.00] | 730.00 [378.00, 2264.00] |
| BAL ILC2 ratio, %                 | 0.16 [0.03, 0.39]        | 0.02 [0.00, 0.63]        |
| BAL cell_number, cells/ $\mu$ l   | 140.00 [70.00, 320.00]   | 260.00 [130.00, 630.00]  |
| BAL Eosinophils, %                | 0.00 [0.00, 0.00]        | 2.00 [0.00, 11.00]       |
| BAL Lymphocytes, %                | 16.50 [10.00, 19.00]     | 11.00 [0.00, 67.00]      |
| BAL Monocytes, %                  | 82.00 [78.00, 88.00]     | 82.00 [30.00, 99.00]     |
| BAL Neutrophils, %                | 1.50 [0.00, 5.00]        | 3.00 [0.00, 16.00]       |
| Never smoker, n                   | NA                       | 3 (12.0)                 |
| Former smoker, n                  | NA                       | 21 (84.0)                |
| Current smoker, n                 | NA                       | 1 ( 4.0)                 |
| Brinkman index                    | NA                       | 550.00 [0.00, 1800.00]   |
| PaO <sub>2</sub> , mmHg           | NA                       | 86.70 [62.80, 108.00]    |
| PaCO <sub>2</sub> , mmHg          | NA                       | 39.20 [33.10, 49.80]     |
| %DLco, %                          | NA                       | 56.94 [32.85, 93.75]     |
| %FEV <sub>1</sub> , %             | NA                       | 85.70 [48.50, 131.00]    |
| %FVC, %                           | NA                       | 83.80 [50.30, 134.50]    |
| Composite Physiologic Index       | NA                       | 39.45 [13.17, 59.70]     |
| KL-6, U/ml                        | NA                       | 720.00 [288.00, 3138.00] |
| SP-D, ng/ml                       | NA                       | 230.50 [17.20, 1000.00]  |
| Progression in one year, n        | NA                       | 12 (48.0)                |
| Death, n                          | NA                       | 9 (36.0)                 |

FVC: forced vital capacity, DLco: diffusion lung capacity of carbon monoxide,

FEV<sub>1</sub>: forced expiratory volume in one second

6MWT: 6-minute walk test, SpO<sub>2</sub>: saturation of peripheral O<sub>2</sub>

PaO<sub>2</sub>: partial pressure of O<sub>2</sub> PaCO<sub>2</sub>: partial pressure of CO<sub>2</sub>

Data are shown as number (%) or median [range].

Fisher's exact test and Mann-Whitney U-test were used for analyses.

Supplementary table S10. Causes of deaths

|                             | ILC2 $\leq$ 1500 (n = 12) | ILC2 > 1500 (n = 6) | <i>P</i> -value |
|-----------------------------|---------------------------|---------------------|-----------------|
| Respiratory death           |                           |                     |                 |
| Chronic respiratory failure | 0 (0.0)                   | 3 (50.0)            | 0.025           |
| Pneumonia                   | 3 (25.0)                  | 0 (0.0)             | 0.515           |
| Lung Cancer                 | 1 (8.3)                   | 2 (33.3)            | 0.245           |
| Acute exacerbation of IPF   | 5 (41.6)                  | 1 (16.7)            | 0.600           |
| Non-Respiratory death       |                           |                     |                 |
| Sudden death/ Heart attack  | 1 (8.3)                   | 0 (0.0)             | > 0.99          |
| Urinary tract infection     | 1 (8.3)                   | 0 (0.0)             | > 0.99          |
| Not clear                   | 1 (8.3)                   | 0 (0.0)             | > 0.99          |

Data are shown as number (%). Fisher's exact test was used for the analyses.

Supplementary table S11. Antibodies used in this study

| Antibody                                                                             | Clone                                    | Distributor       |
|--------------------------------------------------------------------------------------|------------------------------------------|-------------------|
| FITC-conjugated anti-mouse CD4                                                       | GK1.5                                    | Biologend         |
| FITC-conjugated anti-mouse CD5                                                       | 53-7.3                                   | Biologend         |
| FITC-conjugated anti-mouse CD8a                                                      | 53-6.7                                   | Biologend         |
| FITC-conjugated anti-mouse CD3e                                                      | 145-2C11                                 | BD Pharmingen     |
| FITC-conjugated anti-mouse CD19                                                      | 6D5                                      | Biologend         |
| FITC-conjugated anti-mouse CD49b                                                     | DX5                                      | Biologend         |
| FITC-conjugated anti-mouse Gr-1                                                      | RB6-8C5                                  | Biologend         |
| FITC-conjugated anti-mouse Ter119                                                    | Ter119                                   | Biologend         |
| FITC-conjugated anti-mouse CD11b                                                     | M1/70                                    | Biologend         |
| FITC-conjugated anti-mouse CD11c                                                     | N418                                     | Biologend         |
| FITC-conjugated anti-mouse IgE                                                       | RME-1                                    | Biologend         |
| PE-conjugated anti-mouse T1/ST2                                                      | U29-93                                   | BD Pharmingen     |
| APC-conjugated anti-mouse CD45                                                       | 30-F11,                                  | Tonbo biosciences |
| APC-conjugated anti-mouse phospho-STAT5                                              | SRBCZX                                   | eBioscience       |
| APC-Cy7-conjugated anti-mouse/human KLRG1                                            | 2F1                                      | Biologend         |
| PE-Cy7-conjugated anti-mouse Sca-1                                                   | D7                                       | Biologend         |
| PerCP-Cy5.5-conjugated anti-mouse CD45.2                                             | clone 104                                | Biologend         |
| Biotin-conjugated anti-mouse CD45.1                                                  | A20                                      | Biologend         |
| FITC-conjugated anti-human lineage cocktail 1<br>(CD3, CD16, CD19, CD14, CD56, CD20) | SK7, 3G8, SJ25C1,<br>MφP9, NCAM16.2, L27 | BD Pharmingen     |
| PE-conjugate anti-human CRTH2                                                        | BM16                                     | Biologend         |
| APC-conjugated anti-human CD127                                                      | A019D5                                   | Biologend         |
| APC-Cy7-conjugated anti-human CD45                                                   | 2D1                                      | Biologend         |
| BV421-anti-human CD161                                                               | HP-3G10                                  | Biologend         |
| BV421-conjugated Streptavidin                                                        |                                          | Biologend         |
