# Supplementary material
Source: HighWire-hosted journal article supplement (https://erj.ersjournals.com/content/57/3/2000018)
Supplement: inline-supplementary-material-4 [file inline-supplementary-material-4.pdf]

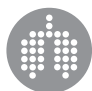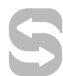

SHAREABLE PDF

# Profibrotic function of pulmonary group 2 innate lymphoid cells is controlled by regnase-1

Yoshinari Nakatsuka<sup>1,2</sup>, Ai Yaku<sup>2,3</sup>, Tomohiro Handa<sup>4</sup>, Alexis Vandenberg<sup>5</sup>, Yuki Hikichi<sup>6</sup>, Yasutaka Motomura<sup>7</sup>, Ayuko Sato<sup>8</sup>, Masanori Yoshinaga<sup>2</sup>, Kiminobu Tanizawa<sup>9</sup>, Kizuku Watanabe<sup>9</sup>, Toyohiro Hirai<sup>9</sup>, Kazuo Chin<sup>1</sup>, Yutaka Suzuki<sup>10</sup>, Takuya Uehata<sup>2</sup>, Takashi Mino<sup>2</sup>, Tohru Tsujimura<sup>8</sup>, Kazuyo Moro<sup>6,7</sup> and Osamu Takeuchi<sup>10</sup>

**Affiliations:** <sup>1</sup>Dept of Respiratory Care and Sleep Medicine, Graduate School of Medicine, Kyoto University, Kyoto, Japan. <sup>2</sup>Dept of Medical Chemistry, Graduate School of Medicine, Kyoto University, Kyoto, Japan. <sup>3</sup>Dept of Rheumatology and Clinical Immunology, Graduate School of Medicine, Kyoto University, Kyoto, Japan. <sup>4</sup>Dept of Advanced Medicine for Respiratory Failure, Graduate School of Medicine, Kyoto University, Kyoto, Japan. <sup>5</sup>Laboratory of Systems Virology, Dept of Biosystems Science, Institute for Frontier Life and Medical Sciences, Kyoto University, Kyoto, Japan. <sup>6</sup>Laboratory for Innate Immune Systems, RIKEN Center for Integrative Medical Sciences, Kanagawa, Japan. <sup>7</sup>Dept of Microbiology and Immunology, Osaka University Graduate School of Medicine, Osaka, Japan. <sup>8</sup>Dept of Pathology, Hyogo College of Medicine, Hyogo, Japan. <sup>9</sup>Dept of Respiratory Medicine, Graduate School of Medicine, Kyoto University, Kyoto, Japan. <sup>10</sup>Laboratory of Functional Genomics, Dept of Medical Genome Sciences, Graduate School of Frontier Sciences, The University of Tokyo, Chiba, Japan.

**Correspondence:** Osamu Takeuchi, Department of Medical Chemistry, Graduate School of Medicine, Kyoto University, Yoshida-Konoe-cho, Sakyo-ku, Kyoto 606-8501, Japan. E-mail: otake@mfour.med.kyoto-u.ac.jp

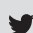

@ERSpublications

**Regnase-1 controls the proliferation and activation of ILC2, which thereby attenuates lung fibrosis in mice. In humans, lower regnase-1 level correlates with more abundant ILC2 number, which potentially associates with the prognosis of IPF patients.** <https://bit.ly/3c3GhKo>

**Cite this article as:** Nakatsuka Y, Yaku A, Handa T, *et al.* Profibrotic function of pulmonary group 2 innate lymphoid cells is controlled by regnase-1. *Eur Respir J* 2021; 57: 2000018 [<https://doi.org/10.1183/13993003.00018-2020>].

This single-page version can be shared freely online.

**ABSTRACT** Regnase-1 is an RNase critical for post-transcriptional control of pulmonary immune homeostasis in mice by degrading immune-related mRNAs. However, little is known about the cell types Regnase-1 controls in the lung, and its relevance to human pulmonary diseases.

Regnase-1-dependent changes in lung immune cell types were examined by a competitive bone marrow transfer mouse model, and group 2 innate lymphoid cells (ILC2s) were identified. Then the associations between Regnase-1 in ILC2s and human diseases were investigated by transcriptome analysis and a bleomycin-induced pulmonary fibrosis mouse model. The clinical significance of Regnase-1 in ILC2s was further assessed using patient-derived cells.

*Regnase-1*-deficiency resulted in the spontaneous proliferation and activation of ILC2s in the lung. Intriguingly, genes associated with pulmonary fibrosis were highly upregulated in *Regnase-1*-deficient ILC2s compared with wild-type, and supplementation of *Regnase-1*-deficient ILC2s augmented bleomycin-induced pulmonary fibrosis in mice. Regnase-1 suppresses mRNAs encoding transcription factors *Gata3* and *Egr1*, which are potent to regulate fibrosis-associated genes. Clinically, Regnase-1 protein levels in ILC2 negatively correlated with the ILC2 population in bronchoalveolar lavage fluid. Furthermore, idiopathic pulmonary fibrosis (IPF) patients with ILC2s >1500 cells·mL<sup>-1</sup> peripheral blood exhibited poorer prognosis than patients with lower numbers, implying the contribution of Regnase-1 in ILC2s for the progression of IPF.

Collectively, Regnase-1 was identified as a critical post-transcriptional regulator of the profibrotic function of ILC2s both in mouse and human, suggesting that Regnase-1 may be a novel therapeutic target for IPF.
